# Supplementary material
Source: PubMed Central journal article supplement (PMC8639645)
Supplement: NIHMS1722207-supplement-supinfo.pdf [file NIHMS1722207-supplement-supinfo.pdf]

# **Dietary N-Nitroso Compounds and Risk of Hepatocellular Carcinoma: A US-Based Study**

Jiali Zheng, PhD<sup>1,2</sup>; Carrie R. Daniel, PhD<sup>2</sup>; Rikita I. Hatia, MPH<sup>2</sup>; Janice Stuff, PhD<sup>3</sup>; Ahmed A. Abdelhakeem, MD<sup>4</sup>; Asif Rashid, MD, PhD<sup>5</sup>; Yun Shin Chun, MD<sup>6</sup>; Prasun K. Jalal, MD<sup>7</sup>; Ahmed O. Kaseb, MD<sup>4</sup>; Donghui Li, PhD<sup>4</sup>; Manal M. Hassan, MD, MPH, PhD<sup>2</sup>

## **Affiliations:**

<sup>1</sup> Department of Epidemiology and Biostatistics, Shanghai Jiao Tong University School of Medicine, Shanghai, China

<sup>2</sup> Department of Epidemiology, The University of Texas MD Anderson Cancer Center, Houston, TX, USA

<sup>3</sup> USDA Children's Nutrition Research Center, Department of Pediatrics, Baylor College of Medicine, Houston, TX, USA

<sup>4</sup> Department of Gastrointestinal Medical Oncology, The University of Texas MD Anderson Cancer Center, Houston, TX, USA

<sup>5</sup> Department of Pathology, The University of Texas MD Anderson Cancer Center, Houston, TX, USA

<sup>6</sup> Department of Surgical Oncology, Division of Surgery, The University of Texas MD Anderson Cancer Center, Houston, TX, USA

<sup>7</sup> Michael E. DeBakey Department of Surgery, Division of Abdominal Transplantation and Hepatobiliary Surgery, Baylor College of Medicine, Houston, TX, USA

**Corresponding author:** Manal M. Hassan, UT MD Anderson Cancer Center, 1155 Pressler Street / Unit 1340, Houston, Texas 77030, USA, Phone: 713-794-5452, Fax: 713-745-1160, Email: mhassan@mdanderson.org

**Key words:** N-nitroso compounds; nitrosamine; diet; carcinogen; hepatocellular carcinomas.

**Word Count:** 5973

**Number of Figures and tables:** 3 (0 Figures, 3 Tables)

**Conflict of interest statement:** The authors declare no competing financial interest or conflict of interest.

**Financial support:** This work was supported by the NIH/NCI under award numbers R01CA186566 (Hassan), P50CA217674 (Kaseb), CA106458-01(Hassan), P30CA016672 (Hassan), RO1CA98380-05 (Li), RO3CA137803 (Li), 2P30CA016672-43 MD Anderson Cancer Center Support Grant (Daniel, Hassan and Li), and the Cancer Prevention and Research Institute of Texas Postdoctoral Training Fellowship under grant number RP170259 (Zheng).

#### **Author contributions**

J.Z. and M.H. designed the study and drafted the manuscript. J.Z. conducted the analyses. J.Z., J.S., C.R.D., D.L., and M.M.H. contributed to the design of the analyses and interpretation of results. J.S. designed the N-nitroso compound concentration database. D.L. and R.I.H. contributed to dietary data collection, management and initial data cleaning. D.L. contributed to control recruitment. A.O.K., P.K.J., and Y.S.C contributed to patient recruitment. R.I.H interviewed cancer patients for all the environmental factors and contacted patients for retrieving the diet questionnaires. A.R.

contributed to the pathological definition of cirrhosis, and virus testing. A.A.A reviewed the radiology and pathology reports of patients for evidence of cirrhosis. All authors critically reviewed, revised, and approved the manuscript.

**Supplemental Table 1. Multivariable-adjusted odds ratios and 95% CIs of HCC risk according to quartiles of consumption of other N-Nitroso compounds (mcg per 1000 kcal/day)**

| N-nitroso compounds from dietary sources                                             | Quartiles of intake <sup>a</sup> |                       |                      |                         | P-trend <sup>b</sup> |
|--------------------------------------------------------------------------------------|----------------------------------|-----------------------|----------------------|-------------------------|----------------------|
|                                                                                      | Q1                               | Q2                    | Q3                   | Q4                      |                      |
| <b>N-Methyl-N-ethylnitrosamine (NMEA)</b>                                            |                                  |                       |                      |                         |                      |
| Mean (range)                                                                         | 0.0006 (<0.001-0.001)            | 0.001 (0.0008-0.0014) | 0.0015 (0.001-0.002) | 0.002 (0.001-0.006)     |                      |
| Case/control (n)                                                                     | 201/254                          | 151/253               | 225/253              | 250/253                 |                      |
| Multivariable-adjusted OR (95% CI) <sup>c</sup>                                      | 1.00                             | 0.55 (0.35-0.86)      | 1.09 (0.73-1.65)     | 0.88 (0.58-1.35)        | 0.86                 |
| <b>Plant sources</b>                                                                 |                                  |                       |                      |                         |                      |
| Case/control (n)                                                                     | 199/254                          | 153/253               | 210/253              | 265/253                 |                      |
| Multivariable-adjusted OR (95% CI) <sup>d</sup>                                      | 1.00                             | 0.65 (0.42-1.01)      | 0.87 (0.57-1.33)     | 0.91 (0.60-1.40)        | 0.70                 |
| <b>Animal sources</b>                                                                |                                  |                       |                      |                         |                      |
| Case/control (n)                                                                     | 209/254                          | 313/322               | 157/184              | 148/253                 |                      |
| Multivariable-adjusted OR (95% CI) <sup>e</sup>                                      | 1.00                             | 1.09 (0.70-1.70)      | 1.42 (0.87-2.32)     | 0.83 (0.51-1.36)        | 0.40                 |
| <b>N-nitrosodibenzylamine (NDBZA)<sup>f</sup></b>                                    |                                  |                       |                      |                         |                      |
| Mean (range)                                                                         | 0                                | 0.07 (0.02-0.09)      | 0.11 (0.06-0.15)     | 0.34 (0.10-2.48)        |                      |
| Case/control (n)                                                                     | 329/288                          | 79/219                | 151/253              | 268/253                 |                      |
| Multivariable-adjusted OR (95% CI) <sup>c,e</sup>                                    | 1.00                             | 0.19 (0.11-0.33)      | 0.53 (0.35-0.81)     | <b>0.59 (0.39-0.88)</b> | *                    |
| <b>N-nitroso-2-(hydroxymethyl)thiazolidine (NHMT)<sup>f</sup></b>                    |                                  |                       |                      |                         |                      |
| Mean (range)                                                                         | 0.0002 (<0.001-0.0014)           | 0.002 (0.0005-0.0025) | 0.002 (0.0018-0.004) | 0.01 (0.003-0.09)       |                      |
| Case/control (n)                                                                     | 268/276                          | 149/231               | 126/253              | 284/253                 |                      |
| Multivariable-adjusted OR (95%CI) <sup>c,e</sup>                                     | 1.00                             | 0.68 (0.43-1.07)      | 0.38 (0.24-0.60)     | 0.92 (0.62-1.37)        | *                    |
| <b>N-nitroso-2-hydroxymethylthiazolidine-4-carboxylic acid (NHMTCA) <sup>f</sup></b> |                                  |                       |                      |                         |                      |
| Mean (range)                                                                         | 4.78 (<0.001-11.43)              | 16.23 (9.55-31.09)    | 30.55 (19.71-52.51)  | 90.39 (37.22-596.51)    |                      |
| Case/control (n)                                                                     | 260/254                          | 230/253               | 155/253              | 182/253                 |                      |
| Multivariable-adjusted OR (95% CI) <sup>c,e</sup>                                    | 1.00                             | 1.00 (0.66-1.50)      | 0.85 (0.54-1.33)     | 0.83 (0.53-1.31)        | 0.39                 |
| <b>N- nitroso-4-hydroxyproline (NHPRO)<sup>f</sup></b>                               |                                  |                       |                      |                         |                      |
| Mean (range)                                                                         | 0.01 (<0.001-0.06)               | 0.12 (0.04-0.18)      | 0.22 (0.13-0.30)     | 0.65 (0.24-4.14)        |                      |
| Case/control (n)                                                                     | 240/254                          | 139/253               | 184/253              | 264/253                 |                      |
| Multivariable-adjusted OR (95% CI) <sup>c,e</sup>                                    | 1.00                             | 0.60 (0.38-0.96)      | 0.84 (0.54-1.29)     | 0.76 (0.49-1.16)        | 0.13                 |

|                                                                                          |                      |                      |                     |                         |             |
|------------------------------------------------------------------------------------------|----------------------|----------------------|---------------------|-------------------------|-------------|
| <b>N-nitrosomorpholine (NMOR)</b>                                                        |                      |                      |                     |                         |             |
| Mean (range)                                                                             | 0.001 (<0.001-0.003) | 0.0034 (0.002-0.004) | 0.005 (0.004-0.007) | 0.01 (0.006-0.074)      |             |
| Case/control (n)                                                                         | 266/254              | 132/253              | 141/253             | <b>288/253</b>          |             |
| Multivariable-adjusted OR (95% CI) <sup>c</sup>                                          | 1.00                 | 0.57 (0.37-0.89)     | 0.58 (0.38-0.91)    | 0.79 (0.52-1.18)        | *           |
| <b>Plant sources</b>                                                                     |                      |                      |                     |                         |             |
| Case/control (n)                                                                         | 410/345              | 47/169               | 101/246             | <b>269/253</b>          |             |
| Multivariable-adjusted OR (95% CI) <sup>d</sup>                                          | 1.00                 | 0.15 (0.08-0.29)     | 0.18 (0.11-0.29)    | <b>0.64 (0.44-0.92)</b> | *           |
| <b>Animal sources</b>                                                                    |                      |                      |                     |                         |             |
| Case/control (n)                                                                         | 244/254              | 150/253              | 157/253             | 276/253                 |             |
| Multivariable-adjusted OR (95% CI) <sup>e</sup>                                          | 1.00                 | 0.75 (0.48-1.17)     | 0.86 (0.55-1.34)    | 0.87 (0.57-1.33)        | 0.49        |
| <b>N-nitroso-5-methyloxazolidine-4-carboxylic acid (NMOCA)<sup>f</sup></b>               |                      |                      |                     |                         |             |
| Mean (range)                                                                             | 0                    | 0.016 (0.005-0.02)   | 0.024 (0.014-0.034) | 0.078 (0.024-0.57)      |             |
| Case/control (n)                                                                         | 329/288              | 79/219               | 151/253             | 268/253                 |             |
| Multivariable-adjusted OR (95% CI) <sup>c,e</sup>                                        | 1.00                 | 0.19 (0.11-0.33)     | 0.53 (0.35-0.81)    | <b>0.59 (0.39-0.88)</b> | *           |
| <b>N-nitroso-2-methylthiazolidine-4-carboxylic acid (NMTCA)<sup>f</sup></b>              |                      |                      |                     |                         |             |
| Mean (range)                                                                             | 0.004 (0.0001-0.016) | 0.028 (0.013-0.039)  | 0.049 (0.029-0.069) | 0.15 (0.06-0.82)        |             |
| Case/control (n)                                                                         | 239/254              | 129/253              | 223/253             | 236/253                 |             |
| Multivariable-adjusted OR (95% CI) <sup>c,e</sup>                                        | 1.00                 | 0.59 (0.37-0.94)     | 1.05 (0.69-1.60)    | <b>0.63 (0.40-0.97)</b> | <b>0.10</b> |
| <b>N-nitrososarcosine (NSAR)<sup>f</sup></b>                                             |                      |                      |                     |                         |             |
| Mean (range)                                                                             | 0                    | 0.005 (0.002-0.006)  | 0.007 (0.004-0.01)  | 0.02 (0.01-0.17)        |             |
| Case/control (n)                                                                         | 329/288              | 79/219               | 151/253             | 268/253                 |             |
| Multivariable-adjusted OR (95% CI) <sup>c,e</sup>                                        | 1.00                 | 0.19 (0.11-0.33)     | 0.53 (0.34-0.81)    | <b>0.59 (0.39-0.88)</b> | *           |
| <b>N-nitrosothiazolidine carboxylic acid and related homologues (NTHZCA)<sup>f</sup></b> |                      |                      |                     |                         |             |
| Mean (range)                                                                             | 0                    | 0.23 (0.18-0.26)     | 0.37 (0.13-0.71)    | 1.32 (0.44-13.36)       |             |
| Case/control (n)                                                                         | 347/505              | 15/4                 | 233/251             | 232/253                 |             |
| Multivariable-adjusted OR (95% CI) <sup>c,e</sup>                                        | 1.00                 | 11.83 (1.46-95.94)   | 1.40 (0.95-2.07)    | 1.00 (0.68-1.47)        | 0.33        |
| <b>N-nitrosoproline (NPRO)</b>                                                           |                      |                      |                     |                         |             |
| Mean (range)                                                                             | 3.27 (0.0001-5.06)   | 6.13 (4.77-8.38)     | 8.94 (7.05-12.46)   | 16.40 (10.15-56.30)     |             |
| Case/control (n)                                                                         | 247/254              | 224/253              | 161/253             | 195/253                 |             |

|                                                                   |                    |                  |                  |                         |              |
|-------------------------------------------------------------------|--------------------|------------------|------------------|-------------------------|--------------|
| Multivariable-adjusted OR (95% CI) <sup>c</sup>                   | 1.00               | 1.15 (0.77-1.74) | 0.71 (0.46-1.10) | 0.82 (0.53-1.27)        | 0.21         |
| <b>Plant sources</b>                                              |                    |                  |                  |                         |              |
| Case/control (n)                                                  | 257/254            | 212/253          | 156/253          | 202/253                 |              |
| Multivariable-adjusted OR (95% CI) <sup>d</sup>                   | 1.00               | 0.89 (0.59-1.34) | 0.65 (0.42-1.01) | 0.70 (0.45-1.09)        | 0.06         |
| <b>Animal sources</b>                                             |                    |                  |                  |                         |              |
| Case/control (n)                                                  | 178/254            | 131/253          | 275/253          | 243/253                 |              |
| Multivariable-adjusted OR (95% CI) <sup>e</sup>                   | 1.00               | 0.97 (0.61-1.55) | 1.34 (0.87-2.05) | 1.08 (0.70-1.68)        | 0.48         |
|                                                                   |                    |                  |                  |                         |              |
| <b>N-nitrosothiazolidine-4 carboxylic-acid (NTCA)<sup>f</sup></b> |                    |                  |                  |                         |              |
| Mean (range)                                                      | 2.09 (0.0001-3.35) | 3.53 (2.97-4.10) | 4.84 (4.00-5.74) | 9.26 (5.51-50.30)       |              |
| Case/control (n)                                                  | 235/254            | 118/253          | 179/253          | 295/253                 |              |
| Multivariable-adjusted OR (95% CI) <sup>c,e</sup>                 | 1.00               | 0.52 (0.33-0.83) | 0.79 (0.51-1.21) | 1.04 (0.69-1.56)        | *            |
|                                                                   |                    |                  |                  |                         |              |
| <b>N-nitrosothiazolidine (NTHZ)<sup>f</sup></b>                   |                    |                  |                  |                         |              |
| Mean (range)                                                      | 0.08 (0.0001-0.14) | 0.16 (0.13-0.20) | 0.24 (0.19-0.29) | 0.40 (0.28-1.20)        |              |
| Case/control (n)                                                  | 285/254            | 163/253          | 201/253          | 178/253                 |              |
| Multivariable-adjusted OR (95% CI) <sup>c,e</sup>                 | 1.00               | 0.59 (0.39-0.91) | 0.63 (0.41-0.96) | <b>0.49 (0.32-0.76)</b> | <b>0.001</b> |

- a. Quartile cut-off points were set as the energy-adjusted log-transformed FFQ-specific value based on control's distribution
- b. P-trend was calculated by using the median value of each quartile of NOC consumption as a continuous variable in the multivariable-adjusted model. P-trend was noted as “\*\*”, If the linearity assumption was not met after assessing it with the restricted cubic spline function within the logistic model ( $P_{\text{non-linearity}} < 0.05$ ).
- c. The model was adjusted for total calorie, age, sex, race, education level, BMI status, alcohol level, and history of diabetes, smoking status, family history of liver cancer, HCV and HBV status as categorized in Table 1.
- d. Multivariable-adjusted model for N-nitroso compounds from plant sources was additionally adjusted for red and processed meat intake level (classified as four-level categorical)
- e. Multivariable-adjusted model for N-nitroso compounds from animal sources was additionally adjusted for total vegetable and fruit intake level (classified as four-level categorical)
- f. Total N-nitroso compounds consumption were all from animal sources

**Supplemental Table 2. Top 5 food contributors\* to NOCs, nitrite and nitrate and energy-adjusted correlation coefficients by case status**

| <b>Compounds</b>      | <b>1</b>                                         | <b>2</b>                                          | <b>3</b>                                          | <b>4</b>                                      | <b>5</b>                                          |
|-----------------------|--------------------------------------------------|---------------------------------------------------|---------------------------------------------------|-----------------------------------------------|---------------------------------------------------|
| <b>Total NOC</b>      |                                                  |                                                   |                                                   |                                               |                                                   |
| Case                  | Green leafy vegetables<br>( $\rho=0.89$ )        | Other vegetables <sup>a</sup><br>( $\rho=0.52$ )  | Roots <sup>b</sup><br>( $\rho=0.38$ )             | Fresh seafood <sup>c</sup><br>( $\rho=0.23$ ) | Chicken<br>( $\rho=0.18$ )                        |
| Control               | Green leafy vegetables<br>( $\rho=0.89$ )        | Other vegetables <sup>a</sup><br>( $\rho=0.44$ )  | Roots <sup>b</sup><br>( $\rho=0.26$ )             | Chicken<br>( $\rho=0.22$ )                    | Fresh seafood <sup>c</sup><br>( $\rho=0.21$ )     |
| <b>Plant sources</b>  |                                                  |                                                   |                                                   |                                               |                                                   |
| Case                  | Green leafy vegetables<br>( $\rho=0.90$ )        | Other vegetables <sup>a</sup><br>( $\rho=0.53$ )  | Roots <sup>b</sup><br>( $\rho=0.37$ )             | Liquid oil <sup>d</sup><br>( $\rho=0.18$ )    | Tofu<br>( $\rho=0.13$ )                           |
| Control               | Green leafy vegetables<br>( $\rho=0.90$ )        | Other vegetables <sup>a</sup><br>( $\rho=0.45$ )  | Roots <sup>b</sup><br>( $\rho=0.26$ )             | Beans and pulses<br>( $\rho=0.17$ )           | Tofu<br>( $\rho=0.12$ )                           |
| <b>Animal sources</b> |                                                  |                                                   |                                                   |                                               |                                                   |
| Case                  | Beef<br>( $\rho=0.65$ )                          | Cured lunch meats <sup>e</sup><br>( $\rho=0.48$ ) | Bacon<br>( $\rho=0.38$ )                          | Sausage<br>( $\rho=0.37$ )                    | Chicken<br>( $\rho=0.32$ )                        |
| Control               | Beef<br>( $\rho=0.70$ )                          | Chicken<br>( $\rho=0.39$ )                        | Cured lunch meats <sup>e</sup><br>( $\rho=0.35$ ) | Bacon<br>( $\rho=0.25$ )                      | Egg<br>( $\rho=0.18$ )                            |
| <b>NDEA</b>           |                                                  |                                                   |                                                   |                                               |                                                   |
| Case                  | Fresh seafood <sup>c</sup><br>( $\rho=0.44$ )    | Other grains <sup>f</sup> ( $\rho=0.43$ )         | Fermented cheese <sup>g</sup><br>( $\rho=0.34$ )  | Salmon<br>( $\rho=0.30$ )                     | Cured lunch meats <sup>e</sup><br>( $\rho=0.25$ ) |
| Control               | Other grains <sup>f</sup><br>( $\rho=0.53$ )     | Fermented cheese <sup>g</sup><br>( $\rho=0.47$ )  | Fresh seafood <sup>c</sup><br>( $\rho=0.44$ )     | Salmon<br>( $\rho=0.27$ )                     | Green leafy vegetables<br>( $\rho=0.20$ )         |
| <b>Plant sources</b>  |                                                  |                                                   |                                                   |                                               |                                                   |
| Case                  | Other grains <sup>f</sup><br>( $\rho=0.99$ )     | Tofu<br>( $\rho=0.18$ )                           | Other vegetables <sup>a</sup><br>( $\rho=0.14$ )  | Beans and pulses<br>( $\rho=0.14$ )           | Green leafy vegetables<br>( $\rho=0.13$ )         |
| Control               | Other grains <sup>f</sup><br>( $\rho=0.99$ )     | Other vegetables <sup>a</sup><br>( $\rho=0.12$ )  | Tofu<br>( $\rho=0.10$ )                           | Beans and pulses<br>( $\rho=0.09$ )           | Green leafy vegetables<br>( $\rho=0.08$ )         |
| <b>Animal sources</b> |                                                  |                                                   |                                                   |                                               |                                                   |
| Case                  | Fermented cheese <sup>g</sup><br>( $\rho=0.47$ ) | Fresh seafood <sup>c</sup><br>( $\rho=0.46$ )     | Cured lunch meats <sup>e</sup><br>( $\rho=0.39$ ) | Cooked meat <sup>h</sup><br>( $\rho=0.34$ )   | Salmon<br>( $\rho=0.28$ )                         |
| Control               | Fermented cheese <sup>g</sup><br>( $\rho=0.55$ ) | Fresh seafood <sup>c</sup><br>( $\rho=0.48$ )     | Cured lunch meats <sup>e</sup><br>( $\rho=0.31$ ) | Salmon<br>( $\rho=0.31$ )                     | Cooked meat <sup>h</sup><br>( $\rho=0.11$ )       |
| <b>NDMA</b>           |                                                  |                                                   |                                                   |                                               |                                                   |
| Case                  | Sausage                                          | Pizza                                             | Cooked meat                                       | Beer                                          | Organ meats                                       |

|                                             |                                              |                                                   |                                                   |                                                  |                                           |
|---------------------------------------------|----------------------------------------------|---------------------------------------------------|---------------------------------------------------|--------------------------------------------------|-------------------------------------------|
|                                             | ( $\rho=0.71$ )                              | ( $\rho=0.48$ )                                   | ( $\rho=0.32$ )                                   | ( $\rho=0.27$ )                                  | ( $\rho=0.26$ )                           |
| Control                                     | Pizza<br>( $\rho=0.66$ )                     | Beer<br>( $\rho=0.45$ )                           | Salmon<br>( $\rho=0.26$ )                         | Sausage<br>( $\rho=0.20$ )                       | Liquor<br>( $\rho=0.17$ )                 |
| <b>Plant sources</b>                        |                                              |                                                   |                                                   |                                                  |                                           |
| Case                                        | Other grains <sup>f</sup><br>( $\rho=0.97$ ) | Roots <sup>b</sup><br>( $\rho=0.19$ )             | Beans and pulses<br>( $\rho=0.14$ )               | Other vegetables <sup>a</sup><br>( $\rho=0.13$ ) | Tofu<br>( $\rho=0.13$ )                   |
| Control                                     | Other grains <sup>f</sup><br>( $\rho=0.98$ ) | Other vegetables <sup>a</sup><br>( $\rho=0.12$ )  | Beans and pulses<br>( $\rho=0.12$ )               | Roots <sup>b</sup><br>( $\rho=0.11$ )            | Green leafy vegetables<br>( $\rho=0.08$ ) |
| <b>Animal sources</b>                       |                                              |                                                   |                                                   |                                                  |                                           |
| Case                                        | Sausage<br>( $\rho=0.74$ )                   | Pizza<br>( $\rho=0.53$ )                          | Cooked meat <sup>h</sup><br>( $\rho=0.36$ )       | Organ meats<br>( $\rho=0.32$ )                   | Hot dog<br>( $\rho=0.27$ )                |
| Control                                     | Pizza<br>( $\rho=0.83$ )                     | Salmon<br>( $\rho=0.29$ )                         | Sausage<br>( $\rho=0.22$ )                        | Fresh seafood<br>( $\rho=0.19$ )                 | Hot dog<br>( $\rho=0.19$ )                |
| <b>Nitrate (NO<sub>3</sub>)</b>             |                                              |                                                   |                                                   |                                                  |                                           |
| Case                                        | Green leafy vegetables<br>( $\rho=0.90$ )    | Other vegetables <sup>a</sup><br>( $\rho=0.52$ )  | Roots <sup>b</sup><br>( $\rho=0.38$ )             | Fresh seafood<br>( $\rho=0.23$ )                 | Chicken<br>( $\rho=0.18$ )                |
| Control                                     | Green leafy vegetables<br>( $\rho=0.90$ )    | Other vegetables <sup>a</sup><br>( $\rho=0.44$ )  | Roots <sup>b</sup><br>( $\rho=0.26$ )             | Chicken<br>( $\rho=0.22$ )                       | Fresh seafood<br>( $\rho=0.21$ )          |
| <b>Plant sources</b>                        |                                              |                                                   |                                                   |                                                  |                                           |
| Case                                        | Green leafy vegetables<br>( $\rho=0.90$ )    | Other vegetables<br>( $\rho=0.53$ )               | Roots <sup>b</sup><br>( $\rho=0.38$ )             | Liquid oil <sup>d</sup><br>( $\rho=0.18$ )       | Tofu<br>( $\rho=0.13$ )                   |
| Control                                     | Green leafy vegetables<br>( $\rho=0.90$ )    | Other vegetables<br>( $\rho=0.45$ )               | Roots <sup>b</sup><br>( $\rho=0.26$ )             | Beans and pulses<br>( $\rho=0.17$ )              | Tofu<br>( $\rho=0.12$ )                   |
| <b>Animal sources</b>                       |                                              |                                                   |                                                   |                                                  |                                           |
| Case                                        | Beef<br>( $\rho=0.58$ )                      | Cured lunch meats <sup>e</sup><br>( $\rho=0.45$ ) | Sausage<br>( $\rho=0.40$ )                        | Chicken<br>( $\rho=0.40$ )                       | Bacon<br>( $\rho=0.36$ )                  |
| Control                                     | Beef<br>( $\rho=0.55$ )                      | Chicken<br>( $\rho=0.55$ )                        | Cured lunch meats <sup>e</sup><br>( $\rho=0.28$ ) | Bacon<br>( $\rho=0.21$ )                         | Pizza<br>( $\rho=0.19$ )                  |
| <b>Nitrite (NO<sub>2</sub>)<sup>i</sup></b> |                                              |                                                   |                                                   |                                                  |                                           |
| Case                                        | Beef<br>( $\rho=0.78$ )                      | Cured lunch meats <sup>e</sup><br>( $\rho=0.50$ ) | Hot dog<br>( $\rho=0.43$ )                        | Bacon<br>( $\rho=0.38$ )                         | Sausage<br>( $\rho=0.22$ )                |
| Control                                     | Beef<br>( $\rho=0.90$ )                      | Cured lunch meats <sup>e</sup><br>( $\rho=0.45$ ) | Hot dog<br>( $\rho=0.32$ )                        | Bacon<br>( $\rho=0.30$ )                         | Egg<br>( $\rho=0.18$ )                    |
| <b>NDBA<sup>l</sup></b>                     |                                              |                                                   |                                                   |                                                  |                                           |
| Case                                        | Beef                                         | Cured lunch meats <sup>e</sup>                    | Bacon                                             |                                                  |                                           |



|                         |                                                   |                                                   |                                                  |                                                   |                                                        |
|-------------------------|---------------------------------------------------|---------------------------------------------------|--------------------------------------------------|---------------------------------------------------|--------------------------------------------------------|
|                         | ( $\rho=0.99$ )                                   | ( $\rho=0.34$ )                                   | ( $\rho=0.26$ )                                  |                                                   |                                                        |
| Control                 | Beef<br>( $\rho=0.99$ )                           | Cured lunch meats <sup>e</sup><br>( $\rho=0.27$ ) | Bacon<br>( $\rho=0.17$ )                         |                                                   |                                                        |
|                         |                                                   |                                                   |                                                  |                                                   |                                                        |
| <b>NDPA<sup>i</sup></b> |                                                   |                                                   |                                                  |                                                   |                                                        |
| Case                    | Fermented cheese <sup>g</sup><br>( $\rho=0.87$ )  | Fresh seafood<br>( $\rho=0.44$ )                  | Salmon<br>( $\rho=0.15$ )                        | Cooked meat <sup>h</sup><br>( $\rho=0.10$ )       |                                                        |
| Control                 | Fermented cheese <sup>g</sup><br>( $\rho=0.89$ )  | Fresh seafood<br>( $\rho=0.44$ )                  | Salmon<br>( $\rho=0.18$ )                        |                                                   |                                                        |
|                         |                                                   |                                                   |                                                  |                                                   |                                                        |
| <b>NPIP<sup>i</sup></b> |                                                   |                                                   |                                                  |                                                   |                                                        |
| Case                    | Cured lunch meats <sup>e</sup><br>( $\rho=0.55$ ) | Fresh dairy <sup>j</sup><br>( $\rho=0.43$ )       | Fermented cheese <sup>g</sup><br>( $\rho=0.27$ ) | Cooked meat <sup>h</sup><br>( $\rho=0.18$ )       | Bacon<br>( $\rho=0.16$ )                               |
| Control                 | Cured lunch meats <sup>e</sup><br>( $\rho=0.53$ ) | Fresh dairy <sup>j</sup><br>( $\rho=0.39$ )       | Fermented cheese <sup>g</sup><br>( $\rho=0.35$ ) | Bacon<br>( $\rho=0.18$ )                          | Evaporated diary products <sup>k</sup> ( $\rho=0.18$ ) |
|                         |                                                   |                                                   |                                                  |                                                   |                                                        |
| <b>NMAMBA</b>           |                                                   |                                                   |                                                  |                                                   |                                                        |
| Case                    | Other grains <sup>f,l</sup><br>( $\rho=0.98$ )    | Pizza<br>( $\rho=0.08$ )                          |                                                  |                                                   |                                                        |
| Control                 | Other grain <sup>f,m</sup><br>( $\rho=0.99$ )     | Pizza<br>( $\rho=0.13$ )                          |                                                  |                                                   |                                                        |
|                         |                                                   |                                                   |                                                  |                                                   |                                                        |
| <b>Plant sources</b>    |                                                   |                                                   |                                                  |                                                   |                                                        |
| Case                    | Other grains <sup>f,l</sup><br>( $\rho=0.99$ )    |                                                   |                                                  |                                                   |                                                        |
| Control                 | Other grains <sup>f,m</sup><br>( $\rho=1.00$ )    |                                                   |                                                  |                                                   |                                                        |
|                         |                                                   |                                                   |                                                  |                                                   |                                                        |
| <b>Animal sources</b>   |                                                   |                                                   |                                                  |                                                   |                                                        |
| Case                    | Pizza<br>( $\rho=1.00$ )                          |                                                   |                                                  |                                                   |                                                        |
| Control                 | Pizza<br>( $\rho=1.00$ )                          |                                                   |                                                  |                                                   |                                                        |
|                         |                                                   |                                                   |                                                  |                                                   |                                                        |
| <b>NPYR</b>             |                                                   |                                                   |                                                  |                                                   |                                                        |
| Case                    | Bacon<br>( $\rho=0.55$ )                          | Chicken<br>( $\rho=0.37$ )                        | Egg<br>( $\rho=0.33$ )                           | Cured lunch meats <sup>e</sup><br>( $\rho=0.24$ ) | Roots <sup>b</sup><br>( $\rho=0.24$ )                  |
| Control                 | Chicken<br>( $\rho=0.53$ )                        | Wine<br>( $\rho=0.41$ )                           | Bacon<br>( $\rho=0.36$ )                         | Egg<br>( $\rho=0.25$ )                            | Fresh seafood <sup>c</sup><br>( $\rho=0.19$ )          |
|                         |                                                   |                                                   |                                                  |                                                   |                                                        |
| <b>Plant sources</b>    |                                                   |                                                   |                                                  |                                                   |                                                        |

|                       |                                                  |                                       |                                                   |                                                   |                                               |
|-----------------------|--------------------------------------------------|---------------------------------------|---------------------------------------------------|---------------------------------------------------|-----------------------------------------------|
| Case                  | Other vegetables <sup>a</sup><br>( $\rho=0.64$ ) | Roots <sup>b</sup><br>( $\rho=0.47$ ) | Other grains <sup>f</sup><br>( $\rho=0.39$ )      | Tofu<br>( $\rho=0.28$ )                           |                                               |
| Control               | Other vegetables <sup>a</sup><br>( $\rho=0.57$ ) | Roots <sup>b</sup><br>( $\rho=0.44$ ) | Other grains <sup>f</sup><br>( $\rho=0.43$ )      | Tofu<br>( $\rho=0.21$ )                           |                                               |
| <b>Animal sources</b> |                                                  |                                       |                                                   |                                                   |                                               |
| Case                  | Bacon<br>( $\rho=0.67$ )                         | Chicken<br>( $\rho=0.40$ )            | Cured lunch meats <sup>e</sup><br>( $\rho=0.34$ ) | Egg<br>( $\rho=0.33$ )                            | Cooked meat<br>( $\rho=0.20$ )                |
| Control               | Chicken<br>( $\rho=0.61$ )                       | Bacon<br>( $\rho=0.53$ )              | Egg<br>( $\rho=0.34$ )                            | Cured lunch meats <sup>e</sup><br>( $\rho=0.27$ ) | Fresh seafood <sup>c</sup><br>( $\rho=0.09$ ) |

\*Energy-adjusted correlation coefficient between each food group contributing to NOC and NOC was calculated to rank the top 5 food contributors if applicable using spearman correlation method. For each NOC, the top 5 food group contributors for case and control separately were listed in order in this table. All correlation coefficients in this table have P values<0.05.

- a. Other vegetables refer to those non-green leafy vegetables such as zucchini and carrots
- b. Roots include yams, potato or potato products in the study
- c. Fresh seafood includes shrimp, other fishes and tuna in this study
- d. Liquid oil refers to olive oil in the study
- e. Cured lunch meats include cured/processed lunch meats such as salami and kielbasa and others
- f. Other grains in this study include brown rice, white rice, chocolate chip, farina (creamed wheat), cookies and bars, oatmeal, bran flakes (breakfast cereal), rye bread, dark bread, muffins, pancake, pasta, popcorn, rolls or sweet rolls.
- g. Fermented cheese in this study include cottage cheese, cream cheese, American cheese, sour cream, and yogurt
- h. Cooked meat refers to pork.
- i. Total N-nitroso compounds consumption were all from animal sources.
- j. Fresh dairy includes skim milk, whole milk, 2% and 1% milk and ice cream, sherbet in the study
- k. Evaporated dairy products are cream, coffee whitener and butter
- l. Top five food items in this category that contribute to NMAMBA are cooked oatmeal/cooked oat bran, other cooked breakfast cereal, brown rice, English muffin, and white rice
- m. Top five food items in this category that contribute to NMAMBA are cooked oatmeal/cooked oat bran, other cooked breakfast cereal, brown rice, English muffin, dark/whole wheat bread

**Supplemental Table 3. Multivariable-adjusted odds ratios and 95% CIs of HCC according to quartiles of consumption of major food contributors to NDEA, NDMA, NMAMBA and NPIP (mcg per 1000 kcal/day)**

| Major food contributors                                                       | Quartiles of intake <sup>a</sup> |                  |                  |                  | P-trend <sup>b</sup> |
|-------------------------------------------------------------------------------|----------------------------------|------------------|------------------|------------------|----------------------|
|                                                                               | Q1                               | Q2               | Q3               | Q4               |                      |
| <b>Major plant-based food contributors to NDEA, NDMA and NMAMBA</b>           |                                  |                  |                  |                  |                      |
| <b>Grains<sup>c</sup></b>                                                     |                                  |                  |                  |                  |                      |
| Case/control (n)                                                              | 170/254                          | 136/253          | 208/253          | 313/253          |                      |
| Multivariable-adjusted OR (95% CI) <sup>d</sup>                               | 1.00                             | 0.82 (0.52-1.29) | 0.98 (0.63-1.52) | 1.60 (1.04-2.45) | 0.03                 |
| <b>Non-green leafy vegetables</b>                                             |                                  |                  |                  |                  |                      |
| Case/control (n)                                                              | 261/254                          | 213/253          | 155/253          | 198/253          |                      |
| Multivariable-adjusted OR (95% CI) <sup>d</sup>                               | 1.00                             | 0.85 (0.56-1.28) | 0.65 (0.42-1.00) | 0.72 (0.47-1.11) | 0.03                 |
| <b>Tofu<sup>e</sup></b>                                                       |                                  |                  |                  |                  |                      |
| Case/control (n)                                                              | 731/908                          |                  |                  | 96/105           |                      |
| Multivariable-adjusted OR (95% CI) <sup>d</sup>                               | 1.00                             |                  |                  | 1.01 (0.60-1.71) | 0.97                 |
| <b>Roots</b>                                                                  |                                  |                  |                  |                  |                      |
| Case/control (n)                                                              | 278/254                          | 156/253          | 162/253          | 231/253          |                      |
| Multivariable-adjusted OR (95% CI) <sup>d</sup>                               | 1.00                             | 0.80 (0.52-1.23) | 0.82 (0.54-1.25) | 1.28 (0.85-1.94) | 0.07                 |
| <b>Green leafy vegetables</b>                                                 |                                  |                  |                  |                  |                      |
| Case/control (n)                                                              | 271/254                          | 178/253          | 161/253          | 217/253          |                      |
| Multivariable-adjusted OR (95% CI) <sup>d</sup>                               | 1.00                             | 0.68 (0.44-1.04) | 0.73 (0.47-1.13) | 0.83 (0.55-1.26) | *                    |
| <b>Major non-plant food contributors to NDEA, NDMA and NMAMBA<sup>f</sup></b> |                                  |                  |                  |                  |                      |
| <b>Fermented cheese products</b>                                              |                                  |                  |                  |                  |                      |
| Case/control (n)                                                              | 274/254                          | 217/253          | 155/253          | 181/253          |                      |
| Multivariable-adjusted OR (95% CI) <sup>d</sup>                               | 1.00                             | 0.93 (0.62-1.40) | 0.85 (0.55-1.33) | 0.83 (0.54-1.29) | 0.88                 |
| <b>Fresh seafood</b>                                                          |                                  |                  |                  |                  |                      |
| Case/control (n)                                                              | 207/254                          | 182/253          | 190/253          | 248/253          |                      |
| Multivariable-adjusted OR (95% CI) <sup>d</sup>                               | 1.00                             | 1.13 (0.73-1.76) | 1.02 (0.66-1.57) | 1.25 (0.82-1.92) | *                    |
| <b>Cured lunch meats</b>                                                      |                                  |                  |                  |                  |                      |
| Case/control (n)                                                              | 329/288                          | 79/219           | 151/253          | 268/253          |                      |
| Multivariable-adjusted OR (95% CI) <sup>d</sup>                               | 1.00                             | 0.19 (0.11-0.34) | 0.51 (0.34-0.78) | 0.63 (0.42-0.93) | <.0001               |
| <b>Pizza</b>                                                                  |                                  |                  |                  |                  |                      |
| Case/control (n)                                                              | 280/294                          | 198/213          | 201/253          | 148/253          |                      |
| Multivariable-adjusted OR (95% CI) <sup>d</sup>                               | 1.00                             | 1.11 (0.69-1.77) | 1.32 (0.88-1.97) | 0.90 (0.59-1.39) | 0.56                 |
| <b>Beer</b>                                                                   |                                  |                  |                  |                  |                      |
| Case/control (n)                                                              | 667/654                          |                  | 59/106           | 101/253          |                      |
| Multivariable-adjusted OR (95% CI) <sup>d</sup>                               | 1.00                             |                  | 0.53 (0.31-0.93) | 0.31 (0.20-0.49) | <.0001               |
| <b>Major animal-based food contributors to NPIP<sup>g</sup></b>               |                                  |                  |                  |                  |                      |

| <b>Fresh dairy products</b>                     |         |                  |                  |                  |   |
|-------------------------------------------------|---------|------------------|------------------|------------------|---|
| Case/control (n)                                | 107/254 | 95/253           | 151/253          | 474/253          |   |
| Multivariable-adjusted OR (95% CI) <sup>d</sup> | 1.00    | 0.83 (0.48-1.44) | 1.34 (0.82-2.20) | 4.98 (3.20-7.77) | * |

- a. Quartile cut-off points were determined based on the FFQ-specific control's distribution
- b. P-trend was calculated by using the median value of each quartile of NOC consumption as a continuous variable in the multivariable-adjusted model. P-trend was noted as “\*”, If the linearity assumption was not met after assessing it with the restricted cubic spline function within the logistic model (Pnon-linearity<0.05).
- c. It refers to grains not contained in vegetables, fruits, nachos, or mixed dishes. Grains in this study included brown rice, white rice, pasta, oatmeal, bran flakes (breakfast cereal), rye bread, dark bread, popcorn. Grains are the most important contributor to NDEA, NDMA, NMAMBA
- d. The model was adjusted for age, total calorie, sex, race, education level, BMI status, alcohol level, history of diabetes and duration combined, smoking status and dose combined, family history of liver cancer (yes, no), HCV status, HBV status
- e. Since there was small number of sample size in the first three quartiles, we combined them together as reference group
- f. Based on the correlation coefficients in the Supplemental Table 2, the major non-plant food sources of NDMA were pizza, sausage, and beer while the major non-plant sources of NDEA included fresh seafood, fermented cheese and cured lunch meats ( $r>0.3$ ). Sausage was not included because of too few controls in the higher quartiles
- g. Cured lunch meats and fermented cheese products listed in the other section of this table were the other two major animal-based food contributors to NPIP

**Supplemental Table 4. Multivariable-adjusted odds ratios and 95% CIs of noncirrhotic HCC risk according to quartiles of consumption of N-Nitroso compounds (mcg per 1000 kcal/day)\***

| N-nitroso compounds from dietary sources          | Quartiles of intake <sup>a</sup> |                  |                  |                         | P-trend <sup>b</sup> |
|---------------------------------------------------|----------------------------------|------------------|------------------|-------------------------|----------------------|
|                                                   | Q1                               | Q2               | Q3               | Q4                      |                      |
| <b>Total N-nitroso compounds<sup>c</sup></b>      |                                  |                  |                  |                         |                      |
| Case/control                                      | 147/254                          | 116/253          | 86/253           | 143/253                 |                      |
| Multivariable-adjusted OR (95% CI) <sup>d</sup>   | 1.00                             | 0.92 (0.57-1.46) | 0.62 (0.38-1.03) | 1.12 (0.71-1.77)        | 0.88                 |
| <b>Plant sources</b>                              |                                  |                  |                  |                         |                      |
| Case/control                                      | 143/254                          | 118/253          | 89/253           | 142/253                 |                      |
| Multivariable-adjusted OR (95% CI) <sup>e</sup>   | 1.00                             | 1.02 (0.63-1.63) | 0.65 (0.39-1.07) | 1.14 (0.72-1.81)        | 0.89                 |
| <b>Animal sources</b>                             |                                  |                  |                  |                         |                      |
| Case/control                                      | 178/254                          | 86/253           | 106/253          | 122/253                 |                      |
| Multivariable-adjusted OR (95% CI) <sup>f</sup>   | 1.00                             | 0.42 (0.26-0.68) | 0.43 (0.26-0.70) | 0.67 (0.43-1.06)        | *                    |
| <b>N-nitrosodiethylamine (NDEA)</b>               |                                  |                  |                  |                         |                      |
| Case/control                                      | 110/254                          | 92/253           | 142/253          | 148/253                 |                      |
| Multivariable-adjusted OR (95% CI) <sup>d</sup>   | 1.00                             | 0.56 (0.34-0.94) | 1.07 (0.68-1.69) | 0.93 (0.58-1.48)        | 0.87                 |
| <b>Plant sources</b>                              |                                  |                  |                  |                         |                      |
| Case/control                                      | 97/254                           | 102/253          | 106/253          | 187/253                 |                      |
| Multivariable-adjusted OR (95% CI) <sup>e</sup>   | 1.00                             | 0.88 (0.54-1.45) | 0.81 (0.49-1.34) | 1.42 (0.88-2.28)        | 0.26                 |
| <b>Animal sources</b>                             |                                  |                  |                  |                         |                      |
| Case/control                                      | 134/254                          | 116/253          | 115/253          | 127/253                 |                      |
| Multivariable-adjusted OR (95% CI) <sup>f</sup>   | 1.00                             | 0.83 (0.51-1.34) | 0.53 (0.33-0.87) | 0.87 (0.54-1.39)        | 0.28                 |
| <b>N-nitrosodimethylamine (NDMA)</b>              |                                  |                  |                  |                         |                      |
| Case/control                                      | 146/254                          | 116/253          | 110/253          | 120/253                 |                      |
| Multivariable-adjusted OR (95% CI) <sup>d</sup>   | 1.00                             | 1.01 (0.64-1.61) | 0.79 (0.49-1.29) | 0.92 (0.57-1.47)        | 0.61                 |
| <b>Plant sources</b>                              |                                  |                  |                  |                         |                      |
| Case/control                                      | 101/254                          | 100/253          | 103/253          | 188/253                 |                      |
| Multivariable-adjusted OR (95% CI) <sup>e</sup>   | 1.00                             | 0.89 (0.54-1.47) | 0.95 (0.58-1.56) | 1.40 (0.87-2.25)        | 0.20                 |
| <b>Animal sources</b>                             |                                  |                  |                  |                         |                      |
| Case/control                                      | 133/254                          | 128/253          | 93/253           | 138/253                 |                      |
| Multivariable-adjusted OR (95% CI) <sup>f</sup>   | 1.00                             | 1.13 (0.70-1.83) | 0.96 (0.58-1.58) | 1.31 (0.82-2.08)        | 0.32                 |
| <b>N-nitrosodibutylamine (NDBA)<sup>g</sup></b>   |                                  |                  |                  |                         |                      |
| Case/control                                      | 171/254                          | 112/253          | 123/253          | 86/253                  |                      |
| Multivariable-adjusted OR (95% CI) <sup>d,f</sup> | 1.00                             | 0.49 (0.31-0.78) | 0.70 (0.44-1.12) | <b>0.37 (0.22-0.60)</b> | <b>0.0002</b>        |

|                                                                 |         |                  |                  |                         |             |
|-----------------------------------------------------------------|---------|------------------|------------------|-------------------------|-------------|
| <b>N-nitrosodipropylamine (NDPA)<sup>g</sup></b>                |         |                  |                  |                         |             |
| Case/control                                                    | 161/254 | 108/253          | 116/253          | 107/253                 |             |
| Multivariable-adjusted OR (95% CI) <sup>d,f</sup>               | 1.00    | 0.58 (0.36-0.93) | 0.92 (0.57-1.48) | 0.79 (0.47-1.31)        | 0.45        |
| <b>N-nitroso-N-(1-methylacetyl)-3-methylbutylamine (NMAMBA)</b> |         |                  |                  |                         |             |
| Case/control                                                    | 101/254 | 98/253           | 126/253          | 167/253                 |             |
| Multivariable-adjusted OR(95% CI) <sup>d</sup>                  | 1.00    | 0.66 (0.40-1.09) | 1.13 (0.71-1.81) | 1.18 (0.74-1.89)        | 0.34        |
| <b>Plant sources</b>                                            |         |                  |                  |                         |             |
| Case/control                                                    | 97/254  | 95/253           | 117/253          | 183/253                 |             |
| Multivariable-adjusted OR (95% CI) <sup>e</sup>                 | 1.00    | 0.83 (0.50-1.37) | 0.96 (0.59-1.56) | 1.41 (0.87-2.26)        | 0.19        |
| <b>Animal sources</b>                                           |         |                  |                  |                         |             |
| Case/control                                                    | 178/294 | 112/213          | 112/253          | 90/253                  |             |
| Multivariable-adjusted OR (95% CI) <sup>f</sup>                 | 1.00    | 1.27 (0.75-2.15) | 1.34 (0.84-2.12) | 0.97 (0.60-1.57)        | 0.62        |
| <b>N-nitrosopyrrolidine (NPYR)</b>                              |         |                  |                  |                         |             |
| Case/control                                                    | 143/254 | 112/253          | 137/253          | 100/253                 |             |
| Multivariable-adjusted OR (95% CI) <sup>d</sup>                 | 1.00    | 1.14 (0.70-1.84) | 1.26 (0.79-2.01) | 0.96 (0.60-1.55)        | 0.94        |
| <b>Plant sources</b>                                            |         |                  |                  |                         |             |
| Case/control                                                    | 152/254 | 89/253           | 122/253          | 129/253                 |             |
| Multivariable-adjusted OR (95% CI) <sup>e</sup>                 | 1.00    | 0.80 (0.49-1.29) | 1.00 (0.63-1.60) | 0.71 (0.44-1.15)        | 0.25        |
| <b>Animal sources</b>                                           |         |                  |                  |                         |             |
| Case/control                                                    | 131/254 | 118/253          | 110/253          | 133/253                 |             |
| Multivariable-adjusted OR (95% CI) <sup>f</sup>                 | 1.00    | 1.12 (0.70-1.80) | 1.08 (0.66-1.77) | 1.04 (0.64-1.67)        | 0.92        |
| <b>N-nitrosopiperidine (NPIP)<sup>g</sup></b>                   |         |                  |                  |                         |             |
| Case/control                                                    | 90/254  | 105/253          | 105/253          | 192/253                 |             |
| Multivariable-adjusted OR (95% CI) <sup>d,f</sup>               | 1.00    | 1.45 (0.86-2.42) | 0.86 (0.50-1.48) | <b>1.97 (1.21-3.19)</b> | <b>0.02</b> |
| <b>Nitrate (NO<sub>3</sub>)<sup>*</sup></b>                     |         |                  |                  |                         |             |
| Case/control                                                    | 146/254 | 114/253          | 85/253           | 147/253                 |             |
| Multivariable-adjusted OR (95% CI) <sup>d</sup>                 | 1.00    | 0.92 (0.58-1.48) | 0.59 (0.36-0.98) | 1.18 (0.75-1.85)        | 0.75        |
| <b>Plant sources</b>                                            |         |                  |                  |                         |             |
| Case/control                                                    | 143/254 | 118/253          | 89/253           | 142/253                 |             |
| Multivariable-adjusted OR (95% CI) <sup>e</sup>                 | 1.00    | 1.03 (0.64-1.65) | 0.65 (0.39-1.08) | 1.15 (0.73-1.82)        | 0.87        |
| <b>Animal sources</b>                                           |         |                  |                  |                         |             |
| Case/control                                                    | 191/254 | 78/253           | 111/253          | 112/253                 |             |

|                                                   |         |                  |                  |                         |              |
|---------------------------------------------------|---------|------------------|------------------|-------------------------|--------------|
| Multivariable-adjusted OR (95% CI) <sup>f</sup>   | 1.00    | 0.37 (0.22-0.62) | 0.56 (0.35-0.89) | 0.66 (0.42-1.04)        | *            |
| <b>Nitrite (NO<sub>2</sub>)<sup>g</sup></b>       |         |                  |                  |                         |              |
| Case/control                                      | 160/254 | 103/253          | 104/253          | 125/253                 |              |
| Multivariable-adjusted OR (95% CI) <sup>d,f</sup> | 1.00    | 0.50 (0.31-0.81) | 0.49 (0.30-0.79) | <b>0.51 (0.32-0.82)</b> | <b>0.001</b> |

\* Units for means and ranges of all NOCs consumption in this table are mcg/1000kcal/day, except three compounds: total N-nitroso compounds, Nitrate, Nitrite, which used unit of mg/1000kcal/day.

a. Quartile cut-off points were set as the energy-adjusted log-transformed FFQ-specific value based on control's distribution

b. P-trend was calculated by using the median value of each quartile of NOC consumption as a continuous variable in the multivariable-adjusted model. P-trend was noted as “\*”, If the linearity assumption was not met after assessing it with the restricted cubic spline function within the logistic model ( $P_{\text{non-linearity}} < 0.05$ ).

c. Intake of total N-nitroso compounds capture all the 23 compounds in the N-nitroso database, ie, 21 individual NOCs plus nitrite and nitrate.

d. The model was adjusted for age, total calorie, sex, race, education level, BMI status, alcohol level, history of diabetes and duration combined, smoking status and dose combined, family history of liver cancer, HCV status, HBV status.

e. Multivariable-adjusted model for NOCs from plant sources was additionally adjusted for red and processed meat intake

f. Multivariable-adjusted model for NOCs from animal sources was additionally adjusted for total vegetable and fruit intake

g. Total N-nitroso compounds consumption were all from animal sources.

**Supplemental Table 5. Multivariable-adjusted odds ratios and 95% CIs of HCC according to quartiles of consumption of N-Nitroso compounds (mcg per 1000 kcal/day)\* among 1,257 subjects who completed the original version of FFQ**

| N-nitroso compounds from dietary sources         | Quartiles of intake <sup>a</sup> |                     |                     |                     | P-trend <sup>b</sup> | P-interaction <sup>c</sup> |
|--------------------------------------------------|----------------------------------|---------------------|---------------------|---------------------|----------------------|----------------------------|
|                                                  | Q1                               | Q2                  | Q3                  | Q4                  |                      |                            |
| <b>Total N-nitroso compounds<sup>d</sup></b>     |                                  |                     |                     |                     |                      |                            |
| Case/control (n)                                 | 108/239                          | 71/239              | 57/239              | 65/239              |                      |                            |
| Multivariable-adjusted OR (95% CI) <sup>e</sup>  | 1.00                             | 0.91<br>(0.36-2.25) | 0.70<br>(0.27-1.84) | 0.64<br>(0.26-1.59) | 0.30                 | 0.24                       |
| <b>Plant sources</b>                             |                                  |                     |                     |                     |                      |                            |
| Multivariable-adjusted OR (95% CI) <sup>f</sup>  | 1.00                             | 0.99<br>(0.40-2.45) | 0.78<br>(0.30-2.00) | 0.63<br>(0.25-1.56) | 0.31                 | 0.18                       |
| <b>Animal sources</b>                            |                                  |                     |                     |                     |                      |                            |
| Multivariable-adjusted OR (95% CI) <sup>g</sup>  | 1.00                             | 0.44<br>(0.17-1.16) | 0.57<br>(0.21-1.55) | 0.44<br>(0.17-1.13) | 0.10                 | 0.61                       |
|                                                  |                                  |                     |                     |                     |                      |                            |
| <b>N-nitrosodiethylamine (NDEA)</b>              |                                  |                     |                     |                     |                      |                            |
| Case/control (n)                                 | 63/239                           | 84/239              | 69/239              | 85/239              |                      |                            |
| Multivariable-adjusted OR (95% CI) <sup>e</sup>  | 1.00                             | 1.30 (0.49-3.40)    | 0.99 (0.38-2.56)    | 0.72 (0.27-1.91)    | 0.43                 | 0.21                       |
| <b>Plant sources</b>                             |                                  |                     |                     |                     |                      |                            |
| Multivariable-adjusted OR (95% CI) <sup>f</sup>  | 1.00                             | 0.81 (0.30-2.21)    | 0.44 (0.16-1.18)    | 0.98 (0.36-2.68)    | 0.71                 | 0.23                       |
| <b>Animal sources</b>                            |                                  |                     |                     |                     |                      |                            |
| Multivariable-adjusted OR (95% CI) <sup>g</sup>  | 1.00                             | 2.46 (0.87-6.90)    | 0.97 (0.38-2.47)    | 0.55 (0.21-1.45)    | *                    | 0.44                       |
|                                                  |                                  |                     |                     |                     |                      |                            |
| <b>N-nitrosodimethylamine (NDMA)</b>             |                                  |                     |                     |                     |                      |                            |
| Case/control (n)                                 | 95/239                           | 62/239              | 83/239              | 61/239              |                      |                            |
| Multivariable-adjusted OR (95% CI) <sup>e</sup>  | 1.00                             | 0.96 (0.38-2.45)    | 1.36 (0.53-3.48)    | 0.60 (0.24-1.51)    | 0.35                 | 0.61                       |
| <b>Plant sources</b>                             |                                  |                     |                     |                     |                      |                            |
| Multivariable-adjusted OR (95% CI) <sup>f</sup>  | 1.00                             | 1.30 (0.47-3.57)    | 0.53 (0.19-1.42)    | 1.30 (0.51-3.34)    | 0.86                 | 0.43                       |
| <b>Animal sources</b>                            |                                  |                     |                     |                     |                      |                            |
| Multivariable-adjusted OR (95% CI) <sup>g</sup>  | 1.00                             | 1.14 (0.44-2.98)    | 0.81 (0.30-2.15)    | 0.83 (0.33-2.07)    | 0.61                 | 0.79                       |
|                                                  |                                  |                     |                     |                     |                      |                            |
| <b>N-nitrosodibutylamine (NDBA)<sup>h</sup></b>  |                                  |                     |                     |                     |                      |                            |
| Case/control (n)                                 | 86/239                           | 70/239              | 74/239              | 71/239              |                      |                            |
| Multivariable-adjusted OR (95% CI) <sup>g</sup>  | 1.00                             | 0.63 (0.25-1.59)    | 0.51 (0.18-1.39)    | 0.60 (0.23-1.52)    | 0.20                 | 0.76                       |
|                                                  |                                  |                     |                     |                     |                      |                            |
| <b>N-nitrosodipropylamine (NDPA)<sup>h</sup></b> |                                  |                     |                     |                     |                      |                            |
| Case/control (n)                                 | 102/239                          | 78/239              | 75/239              | 46/239              |                      |                            |



|                                                                 |         |                  |                  |                  |      |      |
|-----------------------------------------------------------------|---------|------------------|------------------|------------------|------|------|
| Multivariable-adjusted OR (95% CI) <sup>g</sup>                 | 1.00    | 0.82 (0.34-1.99) | 1.51 (0.60-3.83) | 0.57 (0.20-1.61) | 0.60 | 0.16 |
| <b>N-nitroso-N-(1-methylacetyl)-3-methylbutylamine (NMAMBA)</b> |         |                  |                  |                  |      |      |
| Case/control (n)                                                | 64/239  | 71/239           | 67/239           | 99/239           |      |      |
| Multivariable-adjusted OR (95% CI) <sup>e</sup>                 | 1.00    | 0.94 (0.34-2.56) | 0.52 (0.20-1.36) | 1.21 (0.47-3.12) | 0.87 | 0.02 |
| <b>Plant sources</b>                                            |         |                  |                  |                  |      |      |
| Multivariable-adjusted OR (95% CI) <sup>f</sup>                 | 1.00    | 0.72 (0.26-1.98) | 0.38 (0.14-1.02) | 1.08 (0.40-2.92) | 0.85 | 0.10 |
| <b>Animal sources</b>                                           |         |                  |                  |                  |      |      |
| Multivariable-adjusted OR (95% CI) <sup>g</sup>                 | 1.00    | 0.65 (0.23-1.82) | 0.94 (0.38-2.37) | 1.29 (0.53-3.15) | 0.77 | 0.77 |
| <b>N-nitrosopyrrolidine (NPYR)</b>                              |         |                  |                  |                  |      |      |
| Case/control (n)                                                | 111/239 | 64/239           | 69/239           | 57/239           |      |      |
| Multivariable-adjusted OR (95% CI) <sup>e</sup>                 | 1.00    | 0.58 (0.23-1.45) | 0.44 (0.17-1.09) | 0.61 (0.24-1.56) | 0.22 | 0.23 |
| <b>Plant sources</b>                                            |         |                  |                  |                  |      |      |
| Multivariable-adjusted OR (95% CI) <sup>f</sup>                 | 1.00    | 0.51 (0.19-1.39) | 1.13 (0.48-2.69) | 0.51 (0.20-1.30) | 0.30 | 0.26 |
| <b>Animal sources</b>                                           |         |                  |                  |                  |      |      |
| Multivariable-adjusted OR (95% CI) <sup>g</sup>                 | 1.00    | 0.29 (0.10-0.83) | 0.45 (0.16-1.29) | 0.31 (0.12-0.82) | 0.06 | 0.58 |
| <b>N-nitrosopiperidine (NPIP)<sup>h</sup></b>                   |         |                  |                  |                  |      |      |
| Case/control (n)                                                | 59/239  | 68/239           | 73/239           | 101/239          |      |      |
| Multivariable-adjusted OR (95% CI) <sup>g</sup>                 | 1.00    | 1.71 (0.59-4.93) | 1.16 (0.41-3.28) | 0.85 (0.31-2.32) | 0.58 | 0.65 |
| <b>Nitrate (NO<sub>3</sub>)<sup>*</sup></b>                     |         |                  |                  |                  |      |      |
| Case/control (n)                                                | 108/239 | 72/239           | 57/239           | 64/239           |      |      |
| Multivariable-adjusted OR (95% CI) <sup>e</sup>                 | 1.00    | 1.08 (0.43-2.68) | 0.69 (2.67-1.79) | 0.68 (0.27-1.67) | 0.31 | 0.20 |
| <b>Plant sources</b>                                            |         |                  |                  |                  |      |      |
| Multivariable-adjusted OR (95% CI) <sup>f</sup>                 | 1.00    | 0.99 (0.40-2.45) | 0.78 (0.30-2.00) | 0.63 (0.25-1.56) | 0.31 | 0.18 |
| <b>Animal sources</b>                                           |         |                  |                  |                  |      |      |
| Multivariable-adjusted OR (95% CI) <sup>g</sup>                 | 1.00    | 0.30 (0.11-0.79) | 0.61 (0.23-1.62) | 0.41 (0.16-1.02) | 0.07 | 0.43 |
| <b>Nitrite (NO<sub>2</sub>)<sup>h*</sup></b>                    |         |                  |                  |                  |      |      |
| Case/control (n)                                                | 74/239  | 70/239           | 70/239           | 87/239           |      |      |
| Multivariable-adjusted OR (95% CI) <sup>g</sup>                 | 1.00    | 0.68 (0.25-1.86) | 0.68 (0.24-1.86) | 0.58 (0.23-1.44) | 0.24 | 0.90 |

\* The units for all N-nitroso compounds consumption in this table are mcg/1000kcal/day, except three compounds: total N-nitroso compounds, Nitrate, Nitrite, which used unit of mg/1000kcal/day.

- a. Quartile cut-off points were determined based on the FFQ-specific control's distribution
- b. P-trend was calculated by using the median value of each quartile of N-nitroso compound consumption as a continuous variable in the multivariable-adjusted model, “\*” notes the significant non-linearity
- c. P-interaction was assessed by adding the cross-product of version of FFQ and individual NOC in the multivariable-adjusted model among all the subjects
- d. Intake of total N-nitroso compounds capture all the 23 compounds in the N-nitroso database. Unit of intake of total N-nitroso compounds is mg/1000kcal/day.
- e. The multivariable-adjusted model was adjusted for age, total calorie, sex, race, education level, BMI status, alcohol level, history of diabetes and duration combined, smoking status and dose combined, family history of liver cancer, HCV status (negative, positive, missing), HBV status (negative, positive, missing).
- f. Multivariable-adjusted model for N-nitroso compounds from plant sources additionally adjusted for red and processed meat intake level (classified as four-level categorical)
- g. Multivariable-adjusted model for N-nitroso compounds from animal sources additionally adjusted for total vegetable and fruit intake level (classified as four-level categorical)
- h. Total N-nitroso compounds consumption were all from animal sources.
